# Supplementary material for: Suppressing the initial capacity fade in Li-rich Li5FeO4with anionic redox by partial Co substitution – a first-principles study
Source: Royal Society of Chemistry journal article supplement (doi:10.1039/d2se01519f), 2023-01-01
Supplement: d2se01519f1.pdf [file d2se01519f1.pdf]

# Suppressing initial capacity fade in Li-rich $\text{Li}_5\text{FeO}_4$ with anionic redox by partial Co substitution – a first-principles study

Anu Maria Augustine,<sup>ab</sup> Vishnu Sudarsanan,<sup>ab</sup> and P. Ravindran<sup>\*ab</sup>

<sup>a</sup> Department of Physics, Central University of Tamil Nadu, Thiruvavur-610005, India;

<sup>b</sup> Simulation Center for Atomic and Nanoscale MATerials, Central University of Tamil Nadu, Thiruvavur, Tamil Nadu, 610005, India.

E-mail: raviphy@cutn.ac.in

## Supplementary Information

**Table S1**

| Compound                                                        | structural parameters |                    |                    |                     | magnetic moment     |                     |                       |
|-----------------------------------------------------------------|-----------------------|--------------------|--------------------|---------------------|---------------------|---------------------|-----------------------|
|                                                                 | a (Å)                 | b (Å)              | c (Å)              | V (Å <sup>3</sup> ) | Fe ( $\mu_B$ /atom) | Co ( $\mu_B$ /atom) | Total ( $\mu_B$ /f.u) |
| $\text{Li}_5\text{FeO}_4$                                       | 9.195                 | 9.253              | 9.244              | 786.43              | 4.116               |                     | 4.796                 |
|                                                                 | 9.153 <sup>a</sup>    | 9.218 <sup>a</sup> | 9.213 <sup>a</sup> | 777.32 <sup>a</sup> |                     |                     |                       |
| $\text{Li}_{5.125}\text{Fe}_{0.875}\text{Co}_{0.125}\text{O}_4$ | 9.243                 | 9.244              | 9.258              | 791.01              | 4.117               | 2.586               | 4.554                 |
| $\text{Li}_{5.25}\text{Fe}_{0.75}\text{Co}_{0.25}\text{O}_4$    | 9.292                 | 9.239              | 9.268              | 795.7               | 4.117               | 2.586               | 4.313                 |
| $\text{Li}_{5.375}\text{Fe}_{0.625}\text{Co}_{0.375}\text{O}_4$ | 9.332                 | 9.226              | 9.282              | 799.19              | 4.115               | 2.574               | 4.072                 |
| $\text{Li}_{5.5}\text{Fe}_{0.5}\text{Co}_{0.5}\text{O}_4$       | 9.342                 | 9.265              | 9.29               | 804.12              | 4.121               | 2.588               | 3.83                  |
| $\text{Li}_{5.625}\text{Fe}_{0.375}\text{Co}_{0.625}\text{O}_4$ | 9.336                 | 9.267              | 9.316              | 805.84              | 4.121               | 2.588               | 3.588                 |
| $\text{Li}_{5.75}\text{Fe}_{0.25}\text{Co}_{0.75}\text{O}_4$    | 9.331                 | 9.285              | 9.339              | 809.13              | 4.124               | 2.588               | 3.348                 |
| $\text{Li}_{5.875}\text{Fe}_{0.125}\text{Co}_{0.875}\text{O}_4$ | 9.347                 | 9.263              | 9.348              | 809.41              | 4.134               | 2.591               | 3.107                 |
| $\text{Li}_6\text{CoO}_4$                                       | 9.351                 | 9.305              | 9.361              | 814.41              | 2.594               | 2.866               |                       |
| $\text{Li}_5\text{Fe}_{0.875}\text{Co}_{0.125}\text{O}_4$       | 9.194                 | 9.248              | 9.232              | 784.97              | 4.116               | 2.953               | 4.668                 |
| $\text{Li}_5\text{Fe}_{0.75}\text{Co}_{0.25}\text{O}_4$         | 9.196                 | 9.239              | 9.222              | 783.51              | 4.116               | 2.954               | 4.54                  |
| $\text{Li}_5\text{Fe}_{0.625}\text{Co}_{0.375}\text{O}_4$       | 9.196                 | 9.226              | 9.209              | 781.26              | 4.117               | 2.952               | 4.412                 |
| $\text{Li}_5\text{Fe}_{0.5}\text{Co}_{0.5}\text{O}_4$           | 9.191                 | 9.219              | 9.206              | 780.11              | 4.116               | 2.951               | 4.285                 |
| $\text{Li}_5\text{Fe}_{0.375}\text{Co}_{0.625}\text{O}_4$       | 9.192                 | 9.204              | 9.191              | 777.57              | 4.116               | 2.953               | 4.156                 |
| $\text{Li}_5\text{Fe}_{0.25}\text{Co}_{0.75}\text{O}_4$         | 9.197                 | 9.19               | 9.179              | 775.85              | 4.116               | 2.953               | 4.028                 |
| $\text{Li}_5\text{Fe}_{0.125}\text{Co}_{0.875}\text{O}_4$       | 9.195                 | 9.178              | 9.167              | 773.6               | 4.116               | 2.952               | 3.901                 |
| $\text{Li}_5\text{CoO}_4$                                       | 9.194                 | 9.175              | 9.153              | 772.12              | 2.953               | 3.773               |                       |
| $\text{Li}_{4.875}\text{Fe}_{0.875}\text{Co}_{0.125}\text{O}_4$ | 9.174                 | 9.261              | 9.243              | 785.23              | 4.115               | 3.143               | 4.777                 |
| $\text{Li}_{4.75}\text{Fe}_{0.75}\text{Co}_{0.25}\text{O}_4$    | 9.163                 | 9.275              | 9.24               | 785.3               | 4.113               | 3.143               | 4.758                 |
| $\text{Li}_{4.625}\text{Fe}_{0.625}\text{Co}_{0.375}\text{O}_4$ | 9.154                 | 9.28               | 9.236              | 784.54              | 4.113               | 3.145               | 4.74                  |
| $\text{Li}_{4.5}\text{Fe}_{0.5}\text{Co}_{0.5}\text{O}_4$       | 9.125                 | 9.288              | 9.226              | 781.88              | 4.113               | 3.148               | 4.722                 |
| $\text{Li}_{4.375}\text{Fe}_{0.375}\text{Co}_{0.625}\text{O}_4$ | 9.105                 | 9.291              | 9.238              | 781.42              | 4.114               | 3.146               | 4.703                 |
| $\text{Li}_{4.25}\text{Fe}_{0.25}\text{Co}_{0.75}\text{O}_4$    | 9.095                 | 9.27               | 9.258              | 780.45              | 4.114               | 3.146               | 4.685                 |

|                                                                 |       |       |       |        |       |       |       |
|-----------------------------------------------------------------|-------|-------|-------|--------|-------|-------|-------|
| $\text{Li}_{4.125}\text{Fe}_{0.125}\text{Co}_{0.875}\text{O}_4$ | 9.124 | 9.227 | 9.24  | 777.85 | 4.114 | 3.147 | 4.668 |
| $\text{Li}_4\text{CoO}_4$                                       | 9.09  | 9.31  | 9.179 | 776.71 | 3.15  | 4.647 |       |

<sup>a</sup> Johnson, C. S., Kang, S. H., Vaughey, J. T., Pol, S. V., Balasubramanian, M., & Thackeray, M. M. (2010). Li2O Removal from Li5FeO4: A cathode precursor for lithium-ion batteries. *Chemistry of Materials*, 22(3), 1263-1270.

**Figure S1**

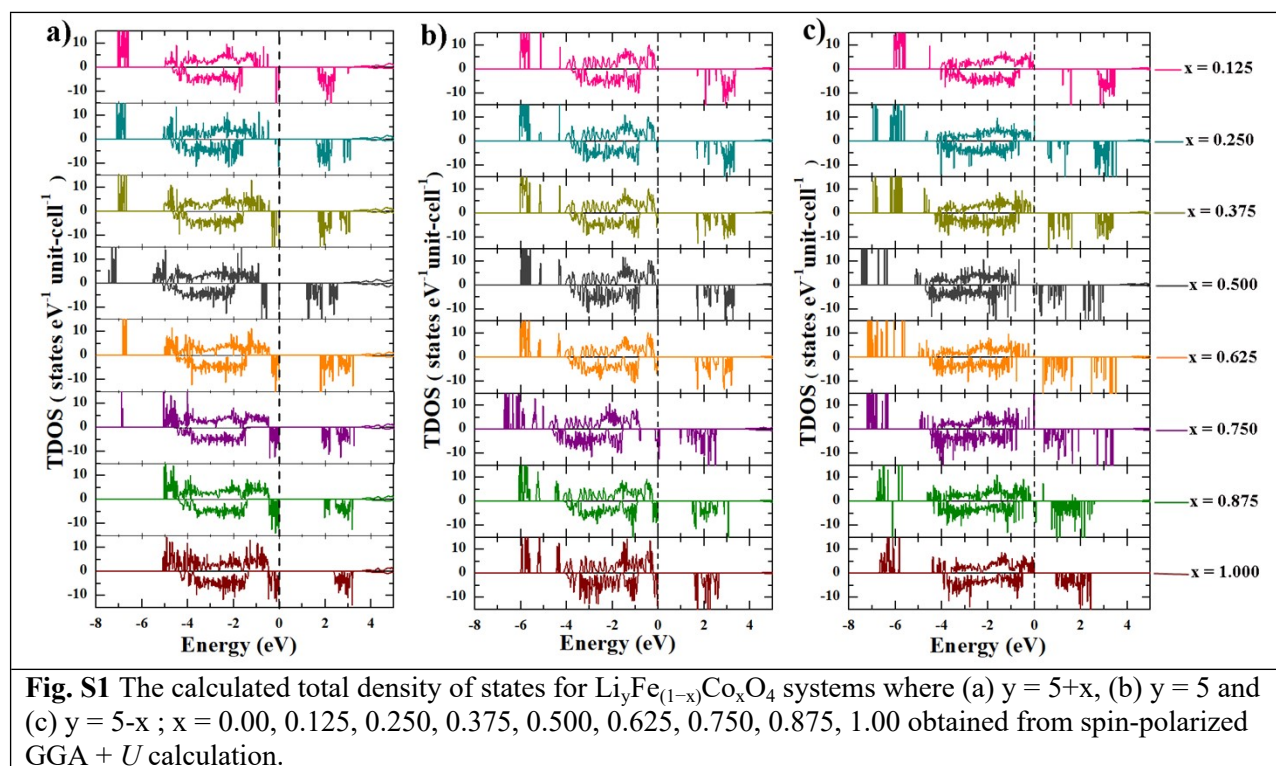

### Supplementary Note S1 : Structural models

As we have discussed in the manuscript, the orthorhombic crystal structure of  $\text{Li}_5\text{FeO}_4$  can be defined as the substitution of a single  $\text{Fe}^{3+}$  ion by removing three Li from the  $2 \times 2 \times 2$  supercell of rocksalt phase  $\text{Li}_2\text{O}$ . This substitution will introduce 16 Li vacancies in the crystal lattice. In the present study, we have substituted Co at the Fe sites in  $\text{Li}_y\text{Fe}_{(1-x)}\text{Co}_x\text{O}_4$  with  $x = 0.00, 0.125, 0.250, 0.375, 0.500, 0.625, 0.750, 0.875, 1.00$  and  $y = 5+x, 5, 5-x$  where Co posses +2, +3, and +4 oxidation states depending upon the composition. To obtain  $\text{Co}^{2+}$  we have added an extra Li with each Co ion. In this case, the Li will be introduced to the Li vacancy site adjacent to the substituted Co sites (note that there are 16 Li vacant sites already available in each unit cell of  $\text{Li}_5\text{FeO}_4$ ). Therefore, when we increase the  $\text{Co}^{2+}$  concentration, the Li concentration also get increases. The Li and Co site at each  $\text{Co}^{2+}$

concentration is given in Figure S2 (a). To model the  $\text{Co}^{3+}$  substitution, the Li concentration is unaltered since Fe is in +3 oxidation state. The  $\text{Co}^{3+}$  substituted sites at different Co concentrations are shown in Figure S2 (b). To model  $\text{Co}^{4+}$  substitution, we have removed one of the Li closer to the substituted Co site. The respective Li and Co position at each stage of  $\text{Co}^{4+}$  substitutions are given in Figure S2 (c). We have modeled the Co substitution in such a way that the Co ions are distributed homogeneously throughout the system.

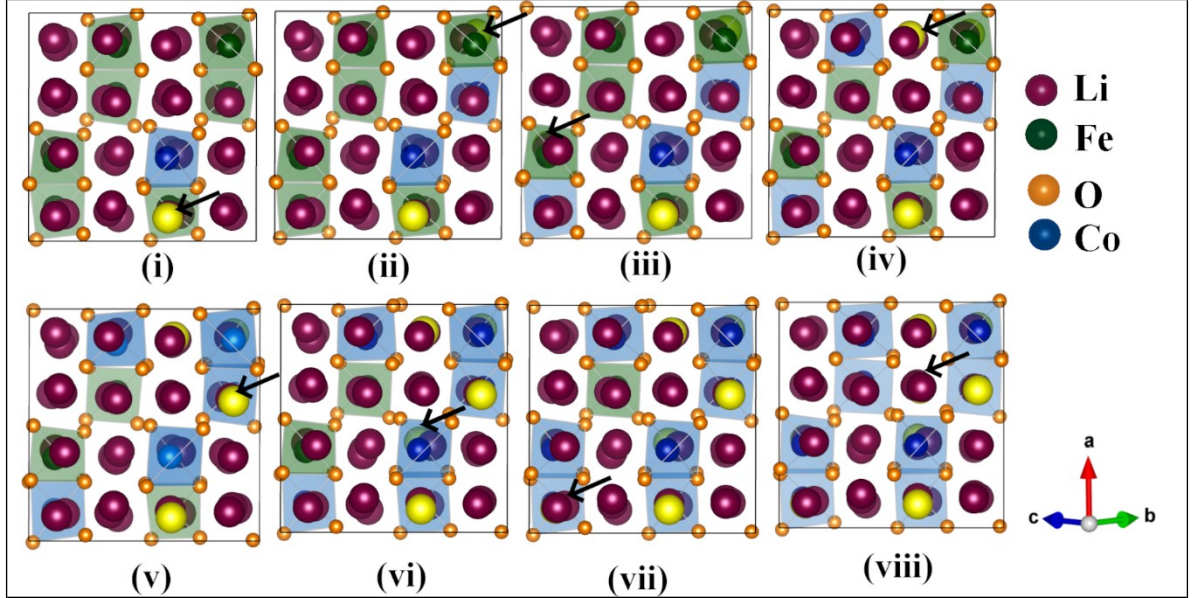

**Figure S2 (a):** The Co substitution and Li co-substitution to obtain  $\text{Co}^{2+}$  at different Co concentrations in  $\text{Li}_y\text{Fe}_{(1-x)}\text{Co}_x\text{O}_4$ . The yellow balls represent the co-substituted Li (each arrow shows the Li added at a particular composition) with  $\text{Co}^{2+}$  substitution. The  $\text{FeO}_4$  and  $\text{CoO}_4$  tetrahedra are given in polyhedral representation. The concentration of Co atom increases from (i) to (viii) ( $x =$  (i) 0.125, (ii) 0.250, (iii) 0.375, (iv) 0.500, (v) 0.625, (vi) 0.750, (vii) 0.875, (viii) 1.00 )

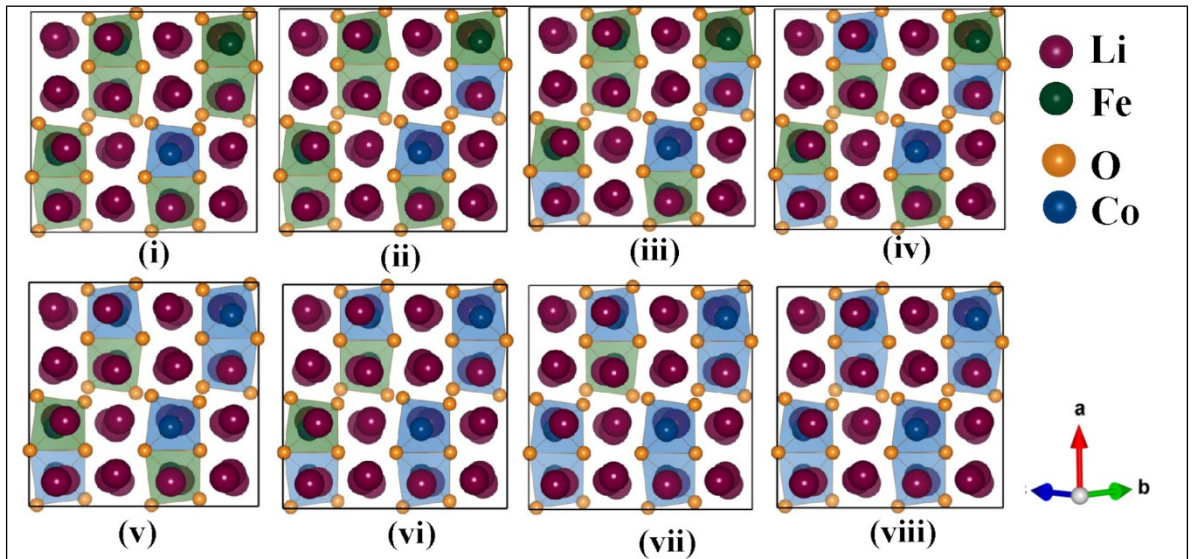

**Figure S2 (b):** The  $\text{Co}^{3+}$  substitution at different Co concentrations in  $\text{Li}_y\text{Fe}_{(1-x)}\text{Co}_x\text{O}_4$ . The Li concentration did not change since we are replacing Fe having +3 oxidation state with Co. The  $\text{FeO}_4$  and  $\text{CoO}_4$  tetrahedra are given in polyhedral representation. The concentration of Co atom increases

from (i) to (viii) (  $x =$  (i) 0.125, (ii) 0.250, (iii) 0.375, (iv) 0.500, (v) 0.625, (vi) 0.750, (vii) 0.875, (viii) 1.00 )

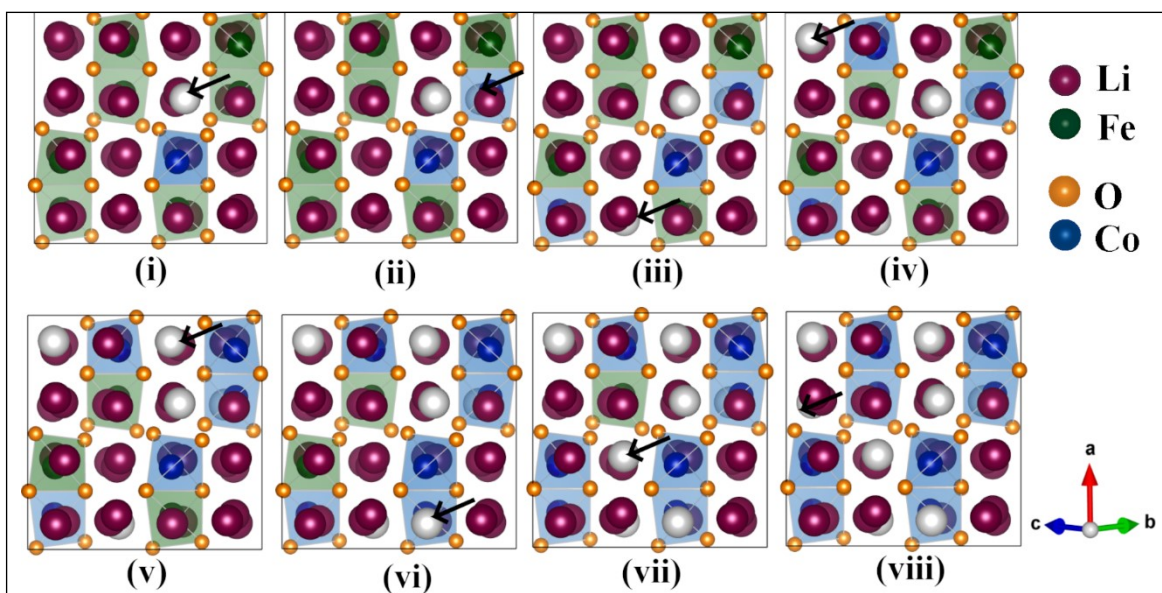

**Figure S2 (c):** The  $\text{Co}^{4+}$  substitution and Li removal at different Co concentrations in  $\text{Li}_y\text{Fe}_{(1-x)}\text{Co}_x\text{O}_4$ . The gray-colored spheres represented the Li vacancies introduced (each arrow shows the Li vacancy introduced at the particular composition) to model  $\text{Co}^{4+}$  substitution. The  $\text{FeO}_4$  and  $\text{CoO}_4$  tetrahedra are given in polyhedral representation. The concentration of Co atom increases from (i) to (viii) (  $x =$  (i) 0.125, (ii) 0.250, (iii) 0.375, (iv) 0.500, (v) 0.625, (vi) 0.750, (vii) 0.875, (viii) 1.00 )
